# BOOKS IN DEVELOPMENT

## BOOKS RECEIVED

The following list contains all books received by the journal up to September 1987. Hopefully this will be a useful guide to books being published in developmental biology. Volumes marked with an asterisk are reviewed in this issue. Others on this list may be reviewed in future issues.

**Ax, P.** *The Phylogenetic System: The Systematization of Organisms on the Basis of their Phylogenesis*. New York: John Wiley & Sons, 1987.

ISBN 0-471 90754 5. £40.00.

**Tilney-Bassett, R. A. E.** (ed) *Plant Chimeras*. UK: Edward Arnold Publishers Ltd, 1986.

ISBN 0-713-10520. £13.50.

**Brachet, J. & Alexander, H.** *Introduction to Molecular Embryology*. 2nd edition. Berlin: Springer-Verlag, 1986.

ISBN 3-540-16968-7.

**Burki, K.** *Experimental Embryology of the Mouse*. Basel: Karger, 1986

ISBN 3-8055-4371-X. \$39.00 (£27.50).

**Callan, H. G.** *Lampbrush Chromosomes. Molecular Biology Biochemistry & Biophysics*, vol. 36. Berlin: Springer-Verlag, 1986.

ISBN 3-540-16430-8.

**Clarkson, T. W., Sager, P. R. & Syversen, T. L. M.** (ed) *The Cytoskeleton: A Target for Toxic Agents. Rochester Series on Environmental Toxicity*. New York: Plenum Press, 1986.

ISBN 0-306-42205-0. \$42.50.

**\*Davidson, E. H.** *Gene Activity in Early Development*. Third Edition, New York: Academic Press, 1986. \$49.50.

**Dove, W. E., Dee, J., Hatano, S., Haughli, F. B. & Wohlfarth-Buttermann, K.-E.**

(ed) *The Molecular Biology of Physarum polycephalum. Series A: Life Sciences* vol. 106. New York: Plenum Press, 1986.

ISBN 0-306-42267-0. \$59.50.

**Giles, K. L. & Prakash, J.** (ed) *Pollen: Cytology and Development: International Review of Cytology*, vol. 107. New York: Academic Press, Inc 1987.

ISBN 0-12-366450707. \$69.50.

**Gehring, W. J., Goodman, D. S., Herskowitz, I., Hynes, R. O., Matthews, B. W., Schwartz, R. S., Sharp, P. A. & Wang, J. C.** *The Harvey Lectures. Series 81*. New York: Alan R. Liss, Inc. 1987.

ISBN 0-8451-1301-1. £32.00.

**Gorczyński, R. M.** (ed) *Receptors in Cellular Recognition and Developmental Processes. Cell Biology: A Series of*

*Monographs*. New York: Academic Press, Inc. 1986.

ISBN 0-12-290530-X. \$54.95.

**Greenberg, A. H.** (ed) *Invertebrate Models: Cell Receptors and Cell Communication*. S. Karger AG Karger 1987.

ISBN 3-8055-4350-6. \$198.00.

**Gregory, P. J., Lake, J. V. & Rose, D. A.** (ed) *Root Development and Function. Society for Experimental Biology: Seminar Series 30*. Cambridge: Cambridge University Press, 1987.

ISBN 0-521-32931-0. £20.00 (\$34.50).

**Guroff, G.** (ed) *Oncogenes, Genes, and Growth Factors*, New York: John Wiley & Sons, Inc., 1987.

ISBN 0-471-82595-6. \$66.95.

**Hedrick, J. L.** (ed) *The Molecular and Cellular Biology of Fertilization. Advances in Experimental Medicine and Biology*, vol. 207. New York: Plenum Press, 1986.

ISBN 0-306-42478-9. \$75.00.

**Hogan, B. L. M., Costantini, F. & Lacy, E.** *Manipulating the Mouse Embryo*. Cold Spring Harbor.

**Hooper, J. K.** *Chloroplasts. Series:*

*Cellular Organelles*. New York: Plenum Press, 1984.

ISBN 0-306-41643-3 (hardback),

ISBN 0-306-4168607 (paperback). \$42.50.

**\*Kahn, P. & Graf, T.** (ed) *Oncogenes and Growth Control*. Berlin: Springer-Verlag, 1986.

ISBN 3-540-16839-7.

**Lewin, B.** (ed) *Genes III* (Third Edition). New York: John Wiley & Sons, 1987.

ISBN 0-471-83278-2. £35.75 (hardback)

£16.95 (paperback) (\$25 50).

**Loomis, W. F.** (ed) *Genetic Regulation of Development. 45th Symposium of the Society for Developmental Biology*. New York: Alan R. Liss, Inc., 1987.

ISBN 0-8451-1506-5.

**Pritchard, D. J.** *Foundations of Developmental Genetics*. UK: Taylor & Francis, 1986.

ISBN 0-85066-356-3 (hardback £33.00)

ISBN 0-85066-287-7 (paperback £14.50).

**Raff, R. A. & Raff, E. C.** (ed).

*Development as an Evolutionary Process*. New York: Alan R. Liss Inc., 1987.

ISBN 0-8451-2207-X £39.00.

**Reznikoff, W. & Gold, L.** (ed) *Maximising Gene Expression*. New York: Butterworth Scientific Ltd., 1986.

ISBN 0-409-90027-3. £63.00 (hardback).

**\*Robertson, E. J.** (ed) *Teratocarcinomas and Embryonic Stem Cells: A Practical Approach*. Oxford: IRL Press, 1987.

ISBN (hardback) 1-85221-005-2, £26.00

(softback) 1-85221-004-4. £17.00.

**Rossant, J. & Pederson, R. A.** (ed) *Experimental Approaches to Mammalian Embryonic Development*. Cambridge: Cambridge University Press, 1987.

ISBN 0-521-3099-3. £47.50 (\$70.00).

**Sawyer, R. H.** (ed) *The Molecular and Developmental Biology of Keratins*. vol. 22. *Current Topics in Developmental Biology*. (A. A. Moscona, A. Monroy). New York, London: Academic Press, Inc., 1987.

ISBN 0-12-153122-8. \$45.00.

**\*Saxen, L.** *Organogenesis of the Kidney*. Cambridge: Cambridge University Press, 1987.

ISBN 0-521-30152-1 £25.00, \$42.50.

**Schroeder, T. E.** (ed) *Methods in Cell Biology*. Vol. 27, *Echinoderm Gametes and Embryos*. New York, Orlando, Florida: Academic Press Inc, 1986.

ISBN 0-12-564127-3 \$80.00.

**Serrero, G. & Hayashi, J.** (ed) *Cellular Endocrinology: Hormonal Control of Embryonic and Cellular Differentiation. Progress in Clinical & Biological Research*: vol. 226. New York: Alan R. Liss Inc., 1986.

ISBN 0-8451-5076-6.

**Sicard, R. E.** (ed) *Regulation of Vertebrate Limb Regeneration*. New York: Oxford University Press Inc., 1985.

ISBN 0-19-503604-2. £45.00.

**Spudich, J. A.** (ed). Dictyostelium Discoideum: *Molecular Approaches to Cell Biology. Methods in Cell Biology*. vol. 28. New York/Orlando, Florida: Academic Press Inc, 1987.

ISBN 0-120564128. \$75.00.

**Thomas, H. & Grierson, D.** (ed) *Developmental Mutants in Higher Plants*.

*Society for Experimental Biology: Seminar Series 32* Cambridge: Cambridge University Press, 1987.

ISBN 0-521-32844-6. £25.00 (\$39 50).

**Trewavas, A. J.** (ed) *Molecular and Cellular Aspects of Calcium in Plant Development. Series A: Life Sciences*, vol. 104. New York: Plenum Press, 1986.

ISBN 0-306-42228-X. \$75.00.

**Turner, A. J. & Bachelard, H. S.** (ed) *Neurochemistry: A Practical Approach. Practical Approach Series*. UK: IRL Press Limited, 1987.

ISBN 1-855221-028-1 (hardback),

ISBN 1-85221-027-3 (paperback).

**Voellmy, R. W., Admad, F., Black, S., Burgess, D. R., Rotundo, R., Scott, W. A. & Whelan, W. J.** (ed) *Advances in Gene Technology: The Molecular Biology of Development. Proceedings of the 19th Miami Winter Symposium. ICSU Short Reports*, vol. 7. Cambridge: Cambridge University Press, 1987.

ISBN 0-521-34274-0. £30.00 (\$49.50).

**\*Walbot, V. & Holder, N.** *Developmental Biology*. New York: Random House Inc., 1987.

ISBN 0-394-33736-0. \$41.60.

**Watson, J. D., Hopkins, N. H., Roberts, J. W., Argetsinger Steitz, J. & Weiner, A. M.** *Molecular Biology of the Gene*, vol. II, *Specialized Aspects*. (4th edn.). USA: The
